# Supplementary material for: Efficacy and safety of the investigational complement C5 inhibitor zilucoplan in patients hospitalized with Covid-19: an open-label randomized controlled trial
Source: Research Square preprint supplement (doi:10.21203/rs.3.rs-1608319/v1), 2022-05-12
Supplement: Supplementary file 1 [file 797369e7de42295cf916ff38.docx]

**Tables**

**
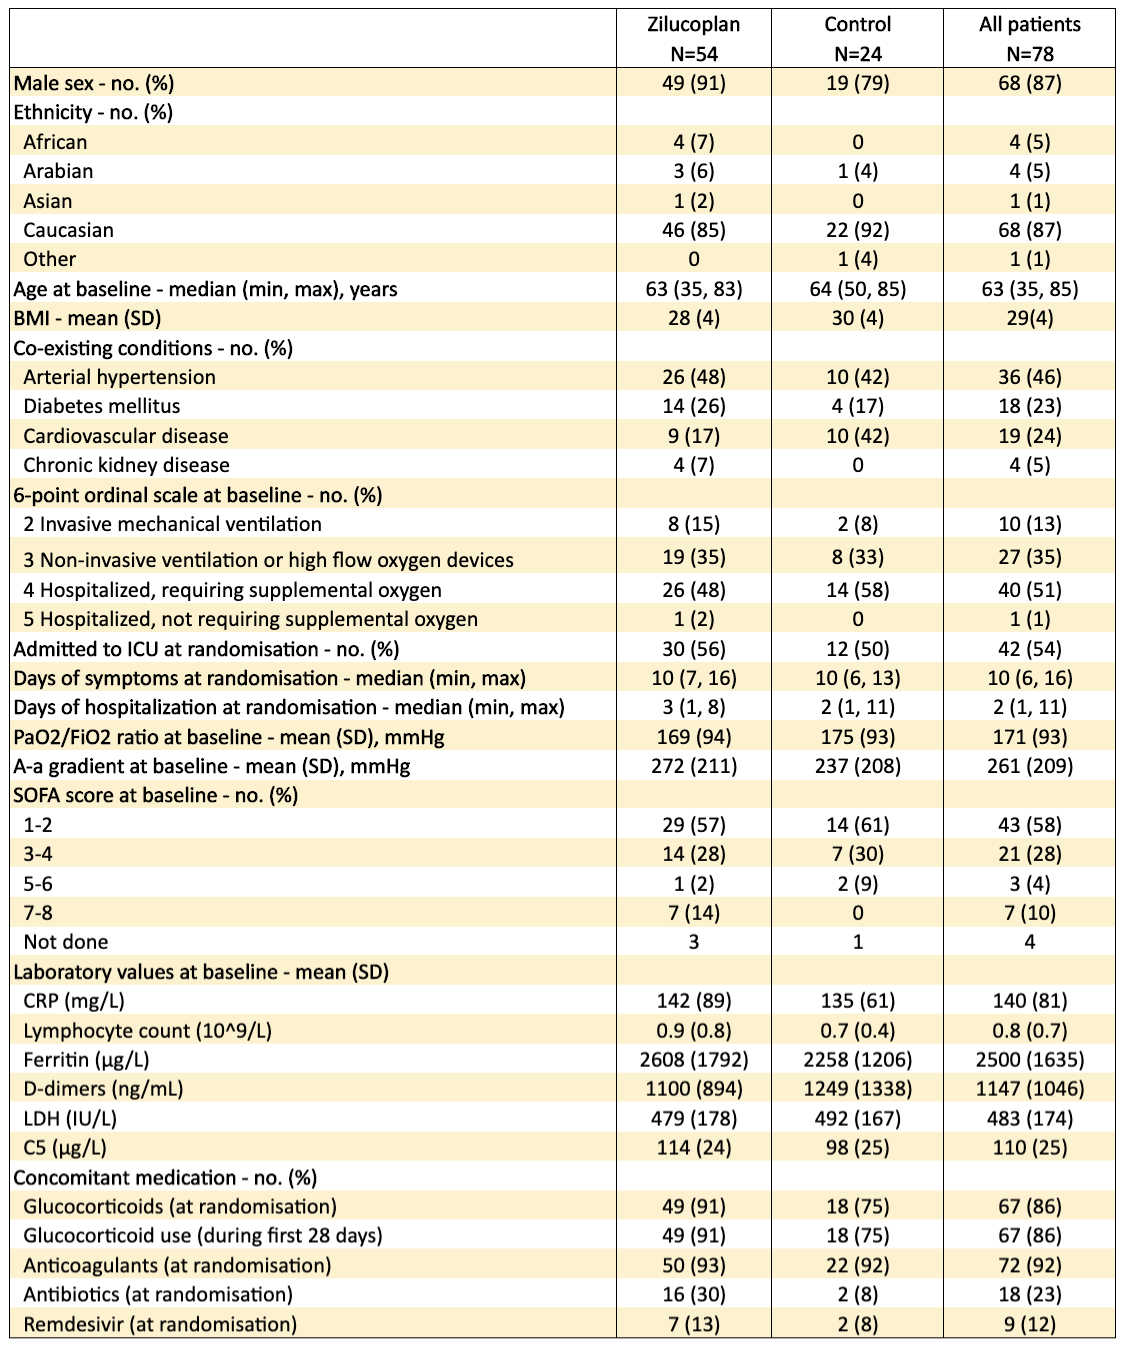
**

**Table 1**: **Characteristics of the patients at baseline according to allocated treatment.**

Body mass index (BMI) was calculated as weight in kilograms divided by height in meters squared. Sex and ethnicity were reported by study participant. Abbreviations: SD, standard deviation; CRP, C-reactive protein; LDH, lactate dehydrogenase; C5, complement 5; SOFA, severity of organ failure assessment; PaO2, partial pressure of arterial oxygen; FiO2, fraction of inspired oxygen.

**
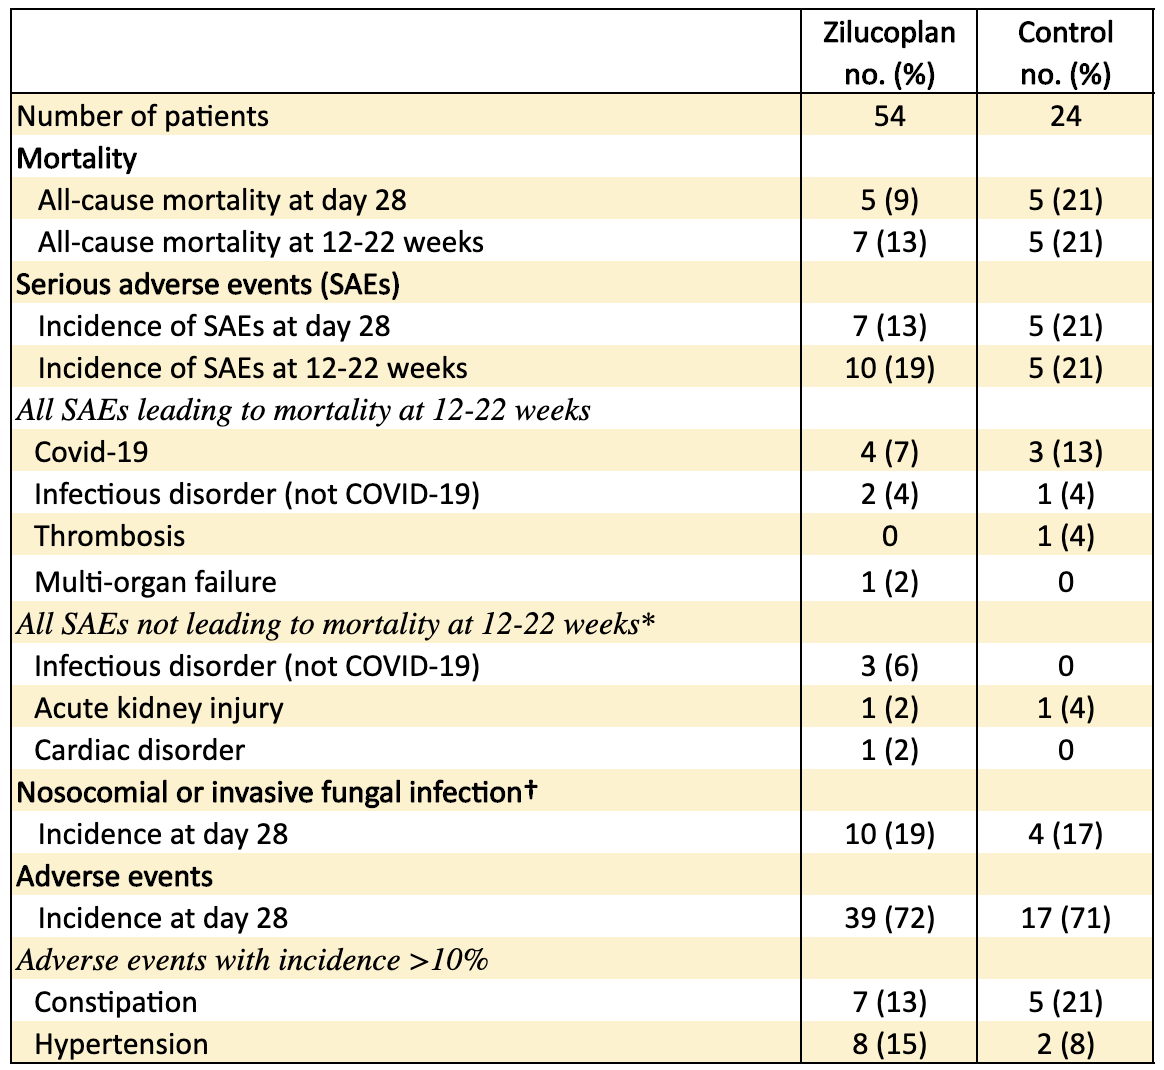
**

**Table 2**: **Mortality and safety endpoints in the safety population.**

SAE, serious adverse events; Covid-19, coronavirus-induced disease 2019.

*Progression and symptoms of Covid-19 were excluded from reporting.

†Requiring treatment
